# Supplementary material for: A vacancy-rich Sn–P–I catalyst for highly efficient black phosphorus preparation and catalytic mechanistic investigation
Source: Royal Society of Chemistry journal article supplement (doi:10.1039/d4gc05850j), 2025-01-01
Supplement: d4gc05850j1.pdf [file d4gc05850j1.pdf]

## Supplementary Information

### Vacancy-Rich Sn-P-I Catalyst for Highly Efficient Black Phosphorus Preparation and Catalytic Mechanistic Investigation

Junping Zhao,<sup>abc</sup> Pengwei Zhao,<sup>d</sup> Guobin Du,<sup>abc</sup> Shaobo Li,<sup>abc</sup> Xiaobin Fan,<sup>d</sup> Delong Xie,<sup>abc</sup> Yuanzhi Zhu,<sup>\*abc</sup> Yi Mei,<sup>\*abc</sup>

<sup>a</sup> Faculty of Chemical Engineering, Kunming University of Science and Technology, Kunming 650500, P. R. China.

<sup>b</sup> Yunnan Provincial Key Laboratory of Energy Saving in Phosphorus Chemical Engineering and New Phosphorus Materials, Kunming 650500, P. R. China.

<sup>c</sup> Yunnan technological innovation center of phosphorus resources, Kunming 650600, P. R. China.

<sup>d</sup> School of Chemical Engineering and Technology, State Key Laboratory of Chemical Engineering, Collaborative Innovation Center of Chemical Science and Engineering, Tianjin University, Tianjin, 300072 China

## DFT calculation details

All the density function theory (DFT) calculations were carried out using the Vienna Ab initio Simulation Package (VASP)<sup>1, 2</sup>. The ionic cores were described with projector augmented wave (PAW) pseudopotential<sup>3, 4</sup> and the valence electrons were into account using a plane wave basis set with a kinetic energy cutoff of 400 eV. The generalized gradient approximation (GGA) was used with the Perdew-Burke-Ernzerhof (PBE) exchange-correlation functional to describe exchange-correlation effects of electrons<sup>5</sup>. A 4 layered  $1 \times 1$  supercell of Sn-I-P (200) was constructed with 4 P atoms on the surface of the slab. A vacuum layer of 15 Å was inserted in the vertical direction of the model to separating the slabs along the perpendicular c-direction. For the geometrical optimizations, a  $3 \times 3 \times 1$   $\Gamma$ -centered Monkhorst-Pack schemed k-mesh was set to sample the first Brillouin zone. The DFT-D3 method included the long-range van der Waals interaction<sup>6-8</sup>. The convergence criterion for the electronic self-consistent field (SCF) loop was set to  $10^{-5}$  eV/atom. The atomic structures were optimized until the residual forces were below  $0.02 \text{ eV \AA}^{-1}$ .

The energy of slabs with n vacancies ( $E_{nv}$ ) were defined as

$$E_{nv\text{-SLAB}} = E_{\text{slab}} - n \times E_{P_4} / 4 \text{ (} E_{P_4} \text{ is the energy of } P_4 \text{ molecular)}$$

The adsorption energy of Pn ( $\Delta E^*_{Pn}$ ) is defined as

$$\Delta E^*_{Pn} = E^*_{Pn} - E_{nv\text{-SLAB}} - n \times E_{P_4} / 4$$

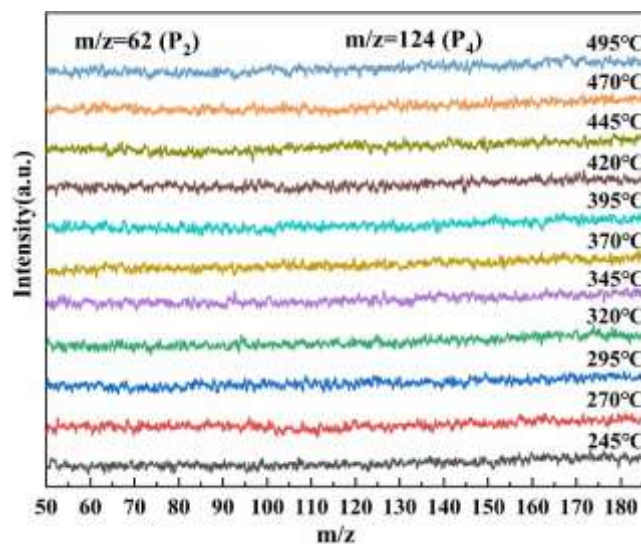

**Fig.S1** Mass spectra of Sn-P-I at different temperatures, with no P<sub>2</sub> signal detected.

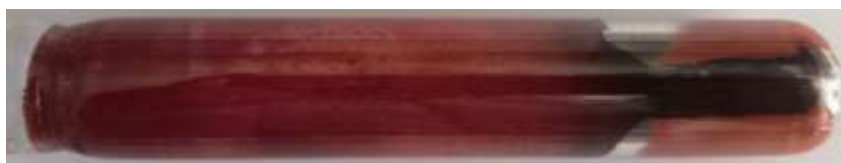

**Fig.S2** Photograph of the quartz tube filled with WP after heating to 800°C, holding for 10 hours, and then slowly cooling to room temperature.

**Table S1. Elemental content of different ratios of synthesized catalysts tested by ICP-MS/OES**

| Samples         | Sn (w%) | I (w%) | P (w%) | molecular formula                                    |
|-----------------|---------|--------|--------|------------------------------------------------------|
| Content of      | 61.66   | 20.06  | 18.21  | Sn <sub>24</sub> P <sub>27.2</sub> I <sub>7.3</sub>  |
| sample elements | 61.97   | 22.16  | 13.69  | Sn <sub>24</sub> P <sub>20.3</sub> I <sub>8.03</sub> |
| W (%)           | 62.69   | 21.31  | 12.16  | Sn <sub>24</sub> P <sub>17.8</sub> I <sub>7.63</sub> |

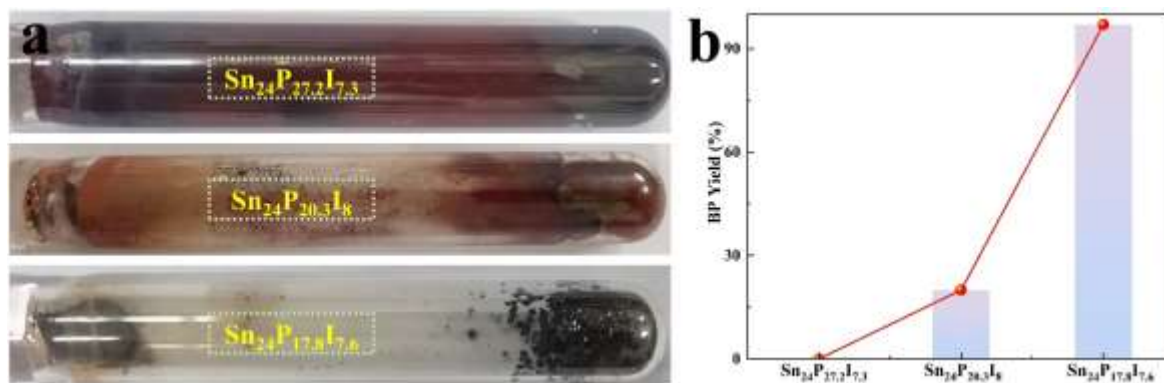

**Fig.S3** (a) Photographs of BP grown using different Sn-P-I catalysts; (b) Corresponding PB yield.

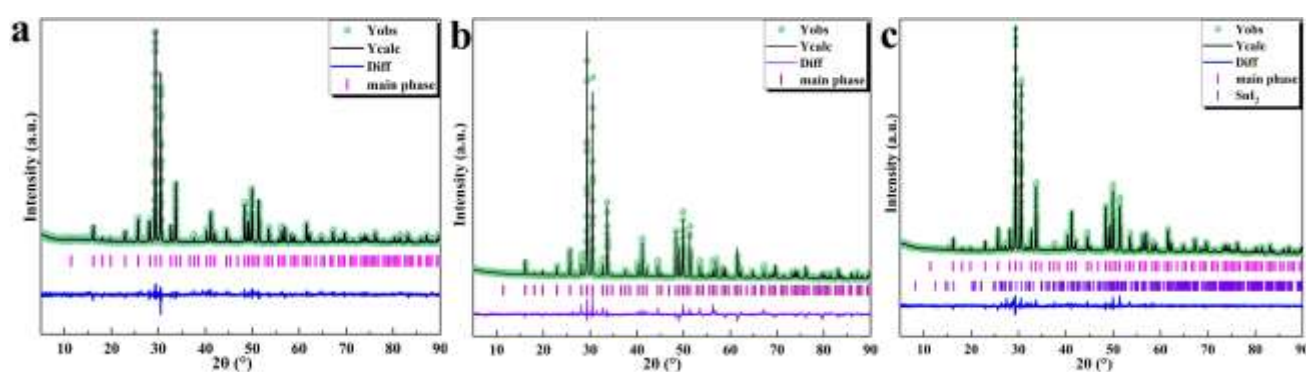

**Fig.S4** XRD refined pattern of (a)  $\text{Sn}_{24}\text{P}_{27.2}\text{I}_{7.3}$ , (b)  $\text{Sn}_{24}\text{P}_{20.3}\text{I}_8$ , and (c)  $\text{Sn}_{24}\text{P}_{17.8}\text{I}_{7.6}$ .

**Table S2.** Cell Parameter of catalysts with different element ratios

| ICP test results   |                         | $\text{Sn}_{24}\text{P}_{27.2}\text{I}_{7.3}$   | $\text{Sn}_{24}\text{P}_{20.3}\text{I}_8$ | $\text{Sn}_{24}\text{P}_{17.8}\text{I}_{7.6}$  |                |
|--------------------|-------------------------|-------------------------------------------------|-------------------------------------------|------------------------------------------------|----------------|
| Molecular formula  |                         | $\text{Sn}_{24}\text{P}_{20.66}\text{I}_{7.94}$ | $\text{Sn}_{24}\text{P}_{19.3}\text{I}_8$ | $\text{Sn}_{24}\text{P}_{20.4}\text{I}_{7.82}$ | $\text{SnI}_2$ |
| Corresponding card |                         | PDF#89-6562                                     | PDF#89-6562                               | PDF#89-6562                                    | PDF#70-1492    |
| Space group        |                         | Pm-3n                                           | Pm-3n                                     | Pm-3n                                          | C2/m           |
| Cell<br>Parameter  | a (Å)                   | 10.95788(10)                                    | 10.957684(44)                             | 10.96168(21)                                   | 14.2021        |
|                    | b (Å)                   | 10.95788(10)                                    | 10.957684(44)                             | 10.96168(21)                                   | 4.5470         |
|                    | c (Å)                   | 10.95788(10)                                    | 10.957684(44)                             | 10.96168(21)                                   | 10.8409        |
|                    | $\alpha$ (°)            | 90                                              | 90                                        | 90                                             | 90             |
|                    | $\beta$ (°)             | 90                                              | 90                                        | 90                                             | 92.10          |
|                    | $\gamma$ (°)            | 90                                              | 90                                        | 90                                             | 90             |
|                    | Volume(Å <sup>3</sup> ) | 1315.768(35)                                    | 1315.698(16)                              | 1317.137(77)                                   | 699.616        |

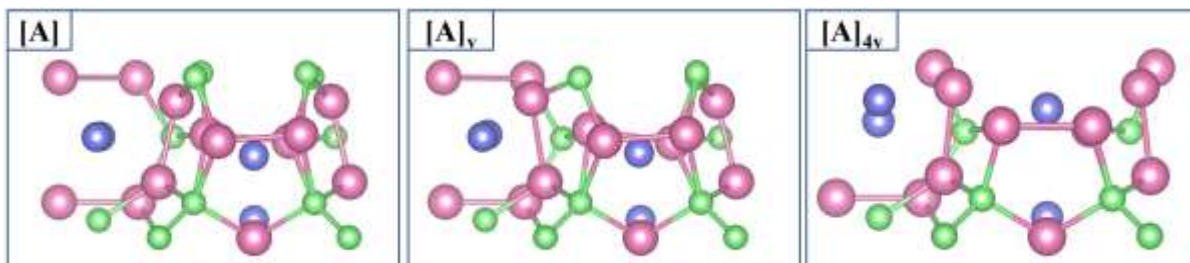

**Fig.S5** Sn-P-I model: models of intact Sn-P-I clathrate (denoted as [A]), single phosphorus vacancies ([A]<sub>v</sub>) and saturated phosphorus vacancies ([A]<sub>4v</sub>)

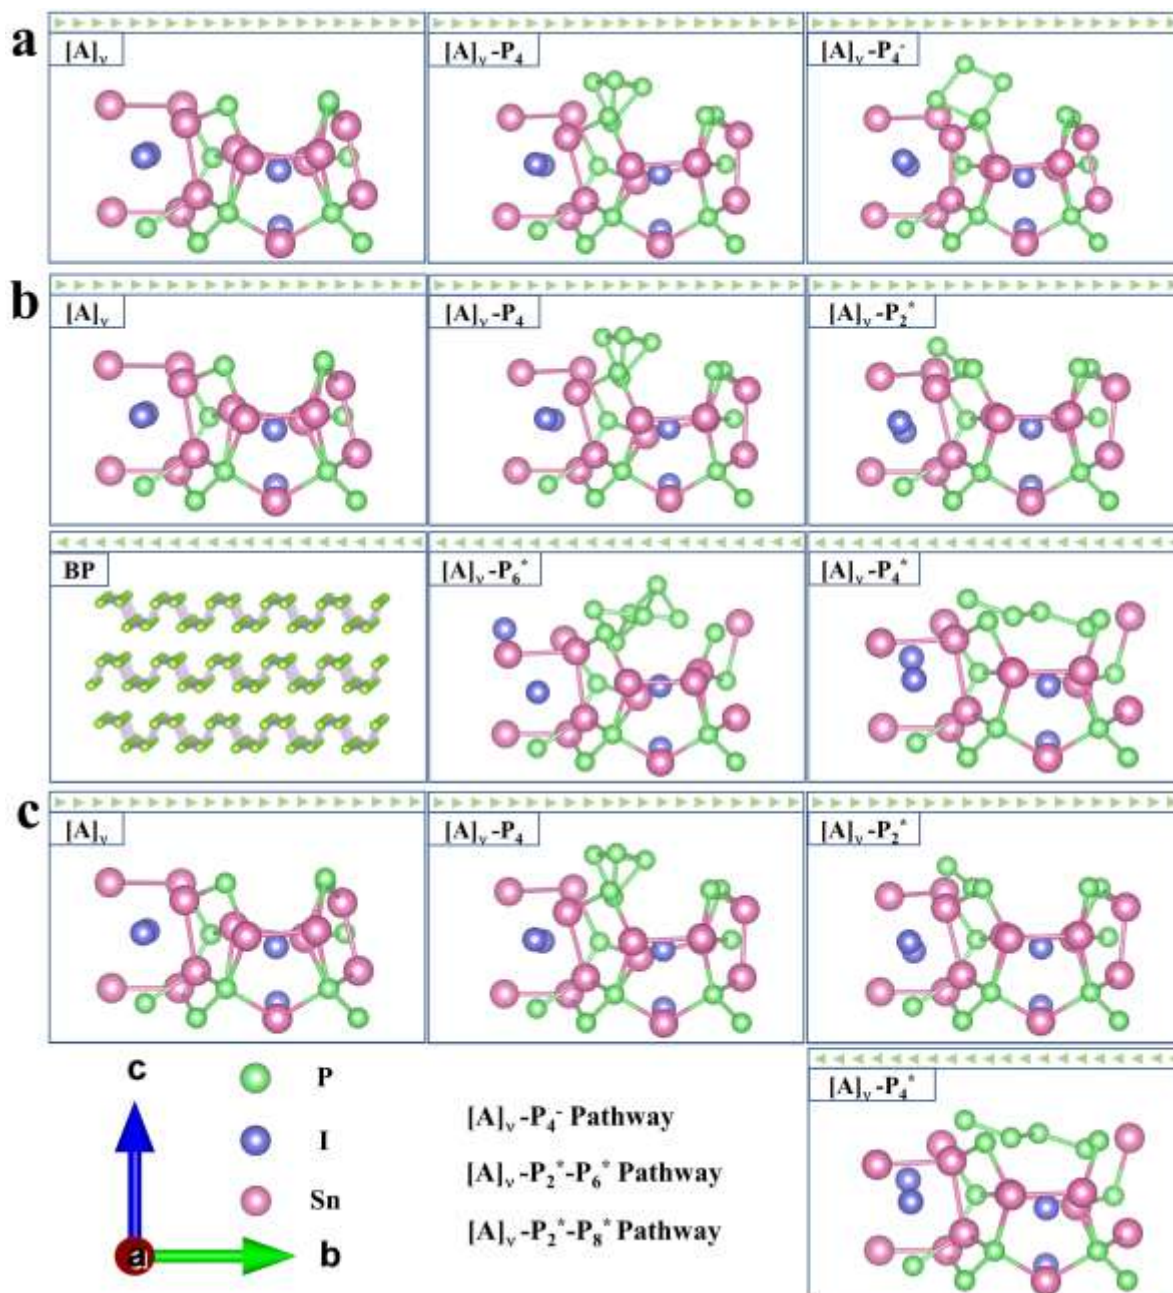

**Fig.S6** Several potential reaction pathways with relatively high energy barriers.

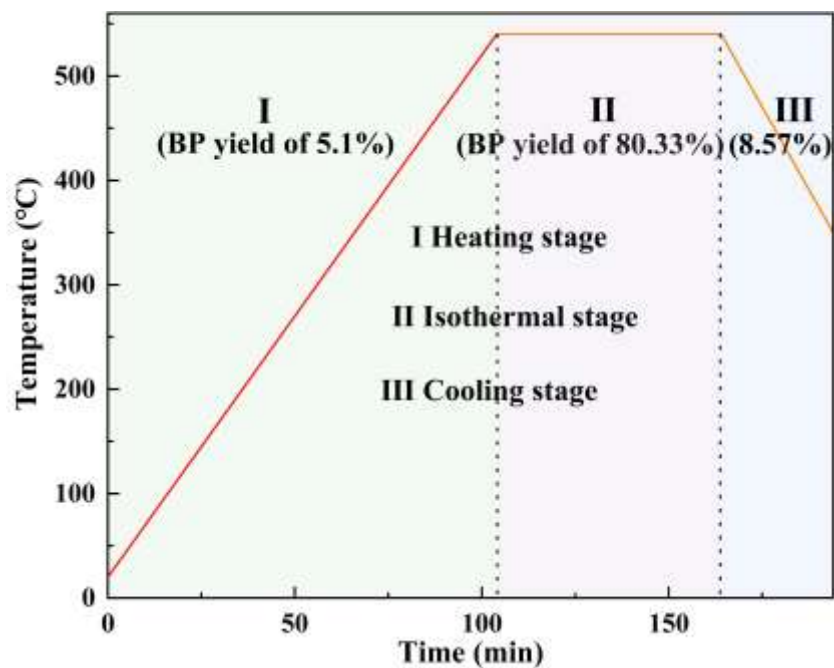

**Fig. S7** BP yields at different reaction stages. The reactions were quenched at different time to obtain BP for analysis.

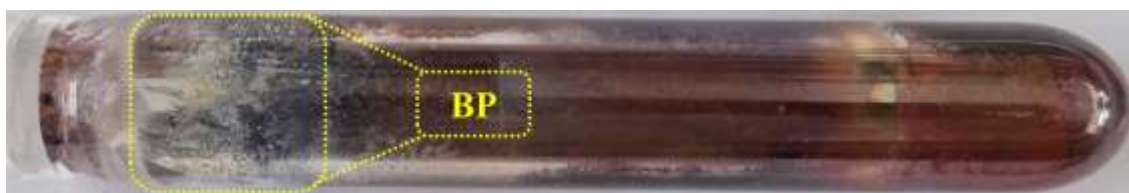

**Fig.S8** Physical images of BP prepared by quenching the reaction with liquid nitrogen.

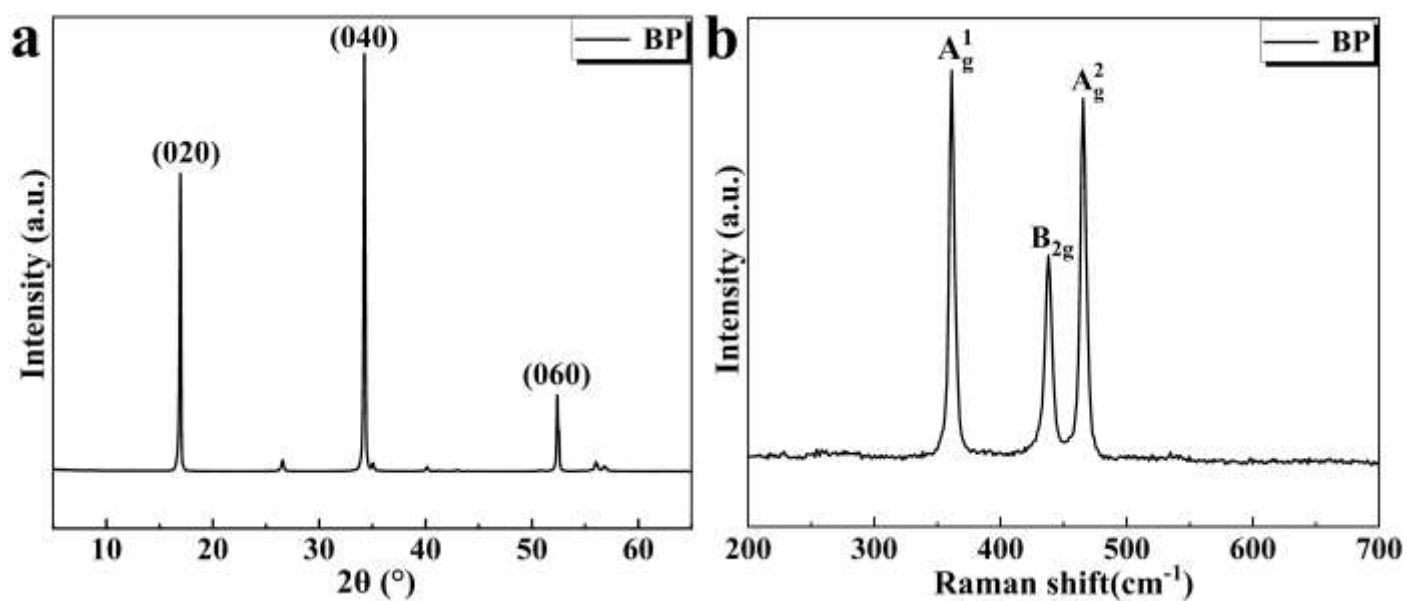

**Fig.S9** (a) XRD pattern of BP. (b) Raman spectra of BP. The BP was prepared by quenching the reaction with liquid nitrogen.

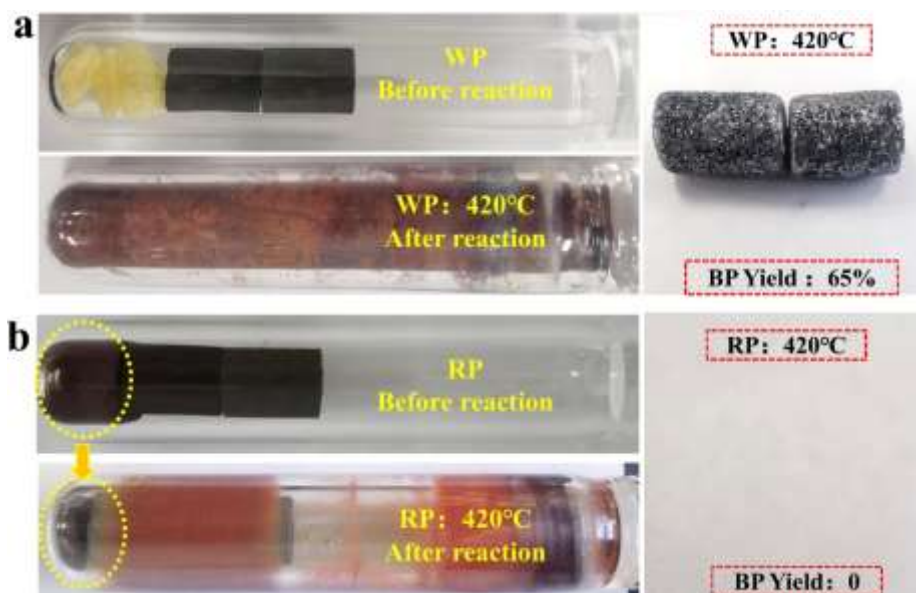

**Fig S10** Physical images of BP prepared from (a) white phosphorus and (b) red phosphorus at 420°C.

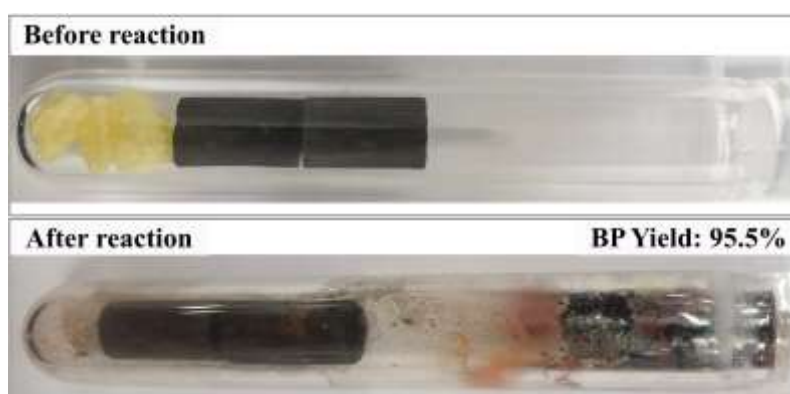

**Fig.S11** Physical images of the rapid BP synthesis within 90 min, with a BP yield of 95.5%.

**Table S3.** Summary of reaction times for black phosphorus preparation

| Materials                                                          | Temperature | reaction time | BP yield | Reference |
|--------------------------------------------------------------------|-------------|---------------|----------|-----------|
| WP(1g)、Sn-P-I(0.4g)                                                | 540-420°C   | 90min         | 95.5%    | This work |
| RP(-)、Sn(-)、I <sub>2</sub> (-)                                     | 590         | -             | -        | 9         |
| RP(-)、Sn(-)、SnI <sub>4</sub> (-)                                   | 620         | 25h           | 88%      | 10        |
| RP(0.5g)、Sn(1g)、I <sub>2</sub> (0.1g)                              | 630-580     | 36h           | 90%      | 11        |
| RP(0.3g)、Sn <sub>24</sub> P <sub>22-x</sub> I <sub>8</sub> (0.02g) | 550         | 30h           | -        | 12        |
| RP(0.3g)、Sn(0.012g)、SnI <sub>4</sub> (0.006g)                      | 650         | 14h           | 90%      | 13        |

**Table S4.** Statistics of waste generated during the reaction process in this method and the traditional

| Method         | method         |        |                    |    |                  |
|----------------|----------------|--------|--------------------|----|------------------|
|                | Present Method |        | Traditional Method |    |                  |
| Raw Materials  | WP             | Sn-P-I | RP                 | Sn | SnI <sub>4</sub> |
| Amount Used/g  | 30             | 5      | 30                 | 6  | 3                |
| BP/g           | 28.65          |        | 27                 |    |                  |
| Total Waste /g | 26.75          |        | 38.75              |    |                  |
| E-factor       | 0.93           |        | 1.44               |    |                  |



- 1 G. Kresse and J. Hafner, *Physical Review B*, 1993, **48**, 13115-13118.
- 2 G. Kresse and J. Hafner, *Physical Review B*, 1993, **47**, 558-561.
- 3 G. Kresse and D. Joubert, *Physical Review B*, 1999, **59**, 1758-1775.
- 4 J. P. Perdew and Y. Wang, *Physical Review B*, 1992, **45**, 13244-13249.
- 5 J. P. Perdew, K. Burke and M. Ernzerhof, *Physical Review Letters*, 1996, **77**, 3865-3868.
- 6 S. Grimme, J. Antony, S. Ehrlich and H. Krieg, *The Journal of Chemical Physics*, 2010, **132**, 154104.
- 7 S. Grimme, S. Ehrlich and L. Goerigk, *J. Comput. Chem*, 2011, **32**, 1456-1465.
- 8 G. Makov and M. C. Payne, *Physical Review B*, 1995, **51**, 4014-4022.
- 9 M. Zhao, H. Qian, X. Niu, W. Wang, L. Guan, J. Sha and Y. Wang, *Crystal Growth & Design*, 2016, **16**, 1096-1103.
- 10 Z. Chen, Y. Zhu, J. Lei, W. Liu, Y. Xu and P. Feng, *CrystEngComm*, 2017, **19**, 7207-7212.
- 11 Z. Zhang, X. Xin, Q. Yan, Q. Li, Y. Yang and T.-L. Ren, *Science China Materials*, 2016, **59**, 122-134.
- 12 S. Li, X. Liu, X. Fan, Y. Ni, J. Miracle, N. Theodoropoulou, J. Sun, S. Chen, B. Lv and Q. Yu, *Crystal Growth & Design*, 2017, **17**, 6579-6585.
- 13 D. Wang, P. Yi, L. Wang, L. Zhang, H. Li, M. Lu, X. Xie, L. Huang and W. Huang, *Frontiers in Chemistry*, 2019, **7**, 21.
